# Supplementary material
Source: Springer Nature journal article supplement (https://www.springermedizin.de/resource/supplementary/12939_2014_468_MOESM4_ESM.pdf/9551232)

*Poor or fair health*

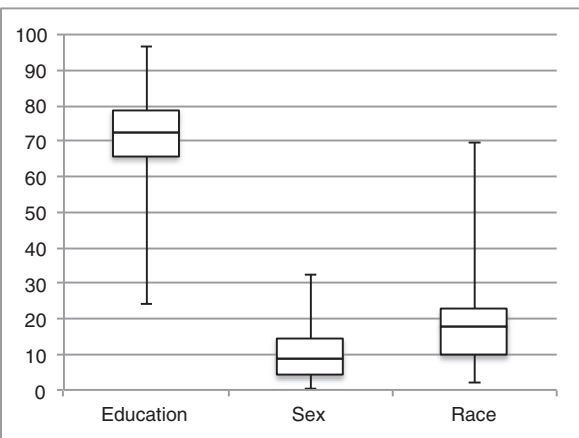

*Poor mental health days*

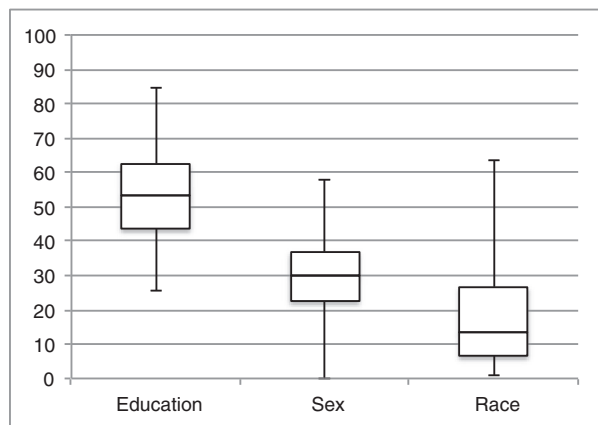

*Poor physical health days*

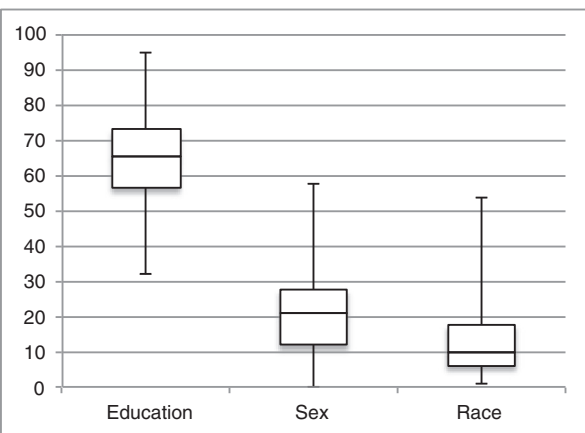

*Low birthweight*

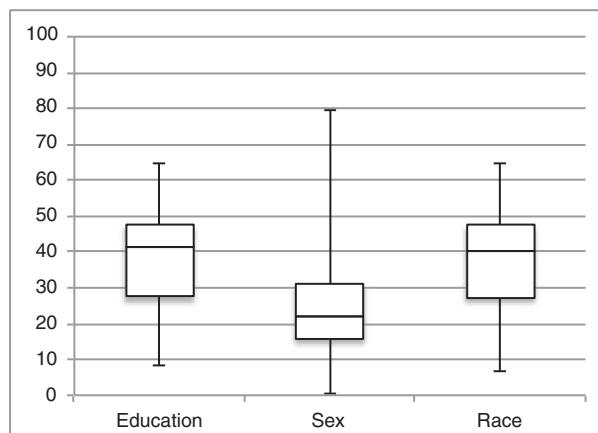

Supplement: MOESM4 [file 9551232]
